# Supplementary material for: Visual detection of formaldehyde by highly selective fluorophore labeling via gold(iii) complex-mediated three-component coupling reaction
Source: Royal Society of Chemistry journal article supplement (doi:10.1039/c5ob00966a), 2015-01-01

## Visual Detection of Formaldehyde by Highly Selective Fluorophore Labeling via Gold(III) Complex-Mediated Three-Component Coupling Reaction

Kong-Fan Wong,<sup>a</sup> Jie-Ren Deng,<sup>a</sup> Xiao-Qun Wei,<sup>b</sup> Shi-Ping Shao,<sup>b</sup> Da-Peng Xiang<sup>\*b</sup>  
and Man-Kin Wong<sup>\*a</sup>

<sup>a</sup> *Food Safety and Technology Research Centre, State Key Laboratory of Chirosciences, and Department of Applied Biology and Chemical Technology, The Hong Kong Polytechnic University, Hung Hom, Hong Kong, China.*

[mankin.wong@polyu.edu.hk](mailto:mankin.wong@polyu.edu.hk)

<sup>b</sup> *Guangdong Inspection and Quarantine Technology Center, Guangdong Entry-Exit Inspection and Quarantine Bureau, Tower B, 66 Huacheng Avenue, Zhujiang Xincheng, Guangzhou, China.*

[xiangdp@iqtc.cn](mailto:xiangdp@iqtc.cn)

## Supporting Information

## General Procedure

All reagents were commercially available and used without further purification. Milli-Q<sup>®</sup> water used as reaction solvent and HPLC mobile phase were deionised using a Milli-Q<sup>®</sup> Gradient A10 system (Millipore, Billerica, USA). Flash column chromatography was performed using silica gel 60 (230-400 mesh, ASTM). <sup>1</sup>H and <sup>13</sup>C NMR spectra were recorded on Bruker DPX-400, DPX-600, Varian Unity Inova 400 NB and 500 NB spectrometers. The chemical shifts are expressed in ppm and coupling constants are given in Hz. Data for <sup>1</sup>H NMR are recorded as follows: chemical shift ( $\delta$ , ppm), multiplicity (s, singlet; br s, broad singlet; d, doublet; dd, double doublet; t, triplet; td, triplet of doublets; m, multiplet), coupling constant (Hz), integration. Data for <sup>13</sup>C NMR are reported in terms of chemical shift ( $\delta$ , ppm). Low resolution mass spectra (MS) and high resolution mass spectra (HR-MS) were obtained on Waters Micromass Q-ToF 2<sup>TM</sup> with positive ESI in terms of mass to charge ratio (m/z). Microplate reader results were obtained with a BMG FLUOstar Galaxy Multi-functional Microplate Reader.

## ESI-MS Analysis of Propargylamine Formation in A3-Coupling Reaction

The mass spectrometer was performed over an m/z range of 100-1000 on Waters Micromass Q-ToF 2<sup>TM</sup> with positive ESI, and the raw spectra were deconvoluted by the MassLynx 4.1 Transform Program (Waters, Manchester, UK). Desolvation and source temperatures were 150 °C and 80 °C, respectively. Operating conditions optimized for the detection of reaction mixture were as the followings: capillary voltage 3 kV, sample cone voltage 30 V, extraction voltage 4 V and collision cell voltage 10 eV.

## HPLC Conditions for Model Reaction Study

Waters 2695 HPLC Separation Module equipped with XTerra MS C18 (5  $\mu$ m, 4.6 mm x 100 mm) Column and Waters 2998 Photodiode Array (PDA) Detector was used for separation. The flow rate was 0.6 mL/min. The injection volume was 10  $\mu$ L. The PDA detector wavelength was set to 254 nm.

Mobile phase A was made of Milli-Q<sup>®</sup> water. Mobile phase B was made of acetonitrile. The initial conditions for separation were 30% B for 3 min, followed by a linear gradient to 70% B by 3 min. The composition was maintained for 4 min, followed by a linear gradient to 100% B by 1 min. The composition was maintained for 3 min, followed by a linear gradient to 30% B by 2 min. The composition was maintained for 2 min.

## LC-MS/MS Conditions for Propargylamine 5a

LC-MS/MS analyses were performed by using a hybrid Q-TOF mass spectrometer (AB Sciex 4000 QTRAP) equipped with an ionspray source and an Agilent 1200 LC. The flow rate was 0.5 mL/min.

Mobile phase A was made of HCOOH-NH<sub>4</sub>OOCH water solution. Mobile phase B was made of acetonitrile. The initial conditions for separation were 100% B for 1 min, followed by a linear gradient to 80% B by 19 min and followed by a linear gradient to 100% B by 18 min. The composition was maintained for 2 min.

## Literature References of Compounds

|                                                                                                                                  |                                                                                                                                                                                  |
|----------------------------------------------------------------------------------------------------------------------------------|----------------------------------------------------------------------------------------------------------------------------------------------------------------------------------|
| 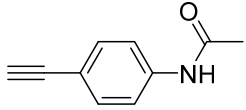 <p style="text-align: center;"><b>2b</b></p>   | <p>W. K. Chan, C. M. Ho, M. K. Wong and C. M. Che, <i>J. Am. Chem. Soc.</i>, 2006, <b>128</b>, 14796–14797.</p>                                                                  |
|  <p style="text-align: center;"><b>2c</b></p>   | <p>M. Maldonado-Domínguez, R. Arcos-Ramos, M. Romero, B. Flores-Pérez, R. Santillan, P. G. Lacroix, I. Malfant and N. Farfán, <i>New J. Chem.</i>, 2014, <b>38</b>, 260–268.</p> |
|  <p style="text-align: center;"><b>3a</b></p>   | <p>H. M. Ko, K. K. Y. Kung, J. F. Cui and M. K. Wong, <i>Chem. Comm.</i>, 2013, <b>49</b>, 8869–8871.</p>                                                                        |
|  <p style="text-align: center;"><b>3b</b></p> | <p>E. C. Constable and T. A. Leese, <i>J. Organomet. Chem.</i>, 1989, <b>363</b>, 419–424.</p>                                                                                   |
|  <p style="text-align: center;"><b>3c</b></p> | <p>M. A. Cinellu, A. Zucca, S. Stoccoro, G. Minghetti, M. Manassero and M. Sansoni, <i>J. Chem. Soc., Dalton Trans.</i>, 1995, 2865–2872.</p>                                    |
|  <p style="text-align: center;"><b>4a</b></p> | <p>P. H. Li and L. Wang, <i>Tetrahedron</i>, 2007, <b>63</b>, 5455–5459.</p>                                                                                                     |

### Procedure for A3-coupling Reaction of Formaldehyde in 1 h

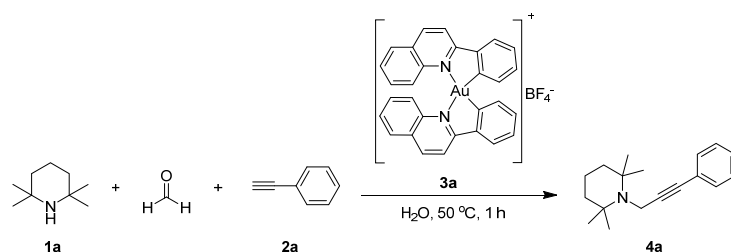

A mixture of formaldehyde (0.1 mmol), 2,2,6,6-tetramethylpiperidine **1a** (0.11 mmol), phenylacetylene **2a** (0.15 mmol) and bis-cyclometallated gold(III) complex **3a** (0.01 mmol) in water (600  $\mu$ L) was stirred at 50 °C for 1 h. Then, the mixture was extracted with dichloromethane (10 mL  $\times$  3). The combined organic layer was dried over anhydrous MgSO<sub>4</sub>, filtered, and concentrated under reduced pressure. The residue was purified by flash column chromatography using ethyl acetate/n-hexane as eluent to give propargylamine **4a** in 6% isolated yield.

### Procedure for Study of Selectivity of 2,2,6,6-Tetramethylpiperidine 1a for Formaldehyde

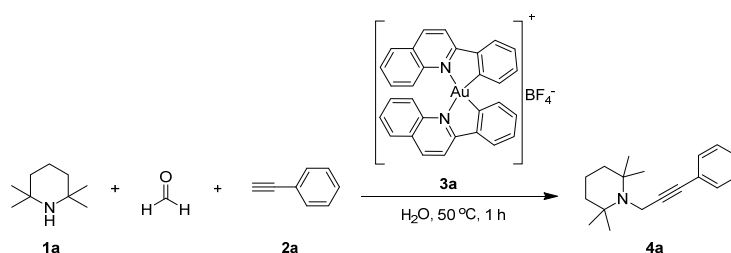

A mixture of formaldehyde (0.1 mmol), 2,2,6,6-tetramethylpiperidine **1a** (0.11 mmol), phenylacetylene **2a** (0.15 mmol) and bis-cyclometallated gold(III) complex **3a** (0.01 mmol) in water (600  $\mu$ L) was stirred at 50 °C for 1 h. Then, the mixture was extracted with dichloromethane (600  $\mu$ L). The organic layer was analyzed by ESI-MS for the formation of propargylamine **4a**.

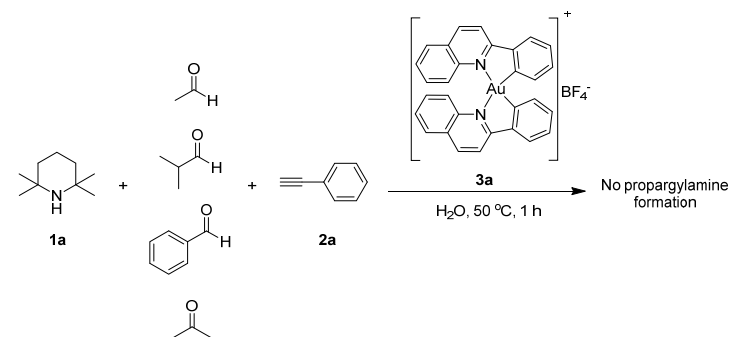

The reaction was repeated with acetaldehyde, isobutyraldehyde, benzaldehyde and acetone instead of formaldehyde, respectively. ESI-MS analysis of the reaction mixtures showed no propargylamine formation for acetaldehyde, isobutyraldehyde, benzaldehyde and acetone.

### Procedure for Synthesis of 1b

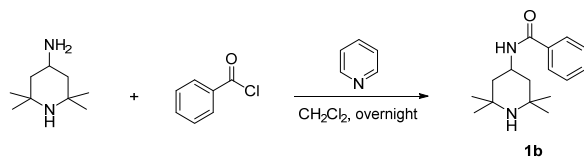

A mixture of 4-amino-2,2,6,6-tetramethylpiperidine (6 mmol), benzoyl chloride (3 mmol) and pyridine (3 mmol) was stirred in dichloromethane (20 mL) under nitrogen atmosphere at room temperature for overnight. After reaction, the mixture was concentrated under reduced pressure. The residue was purified by flash column chromatography using methanol/ethyl acetate as eluent to give amine **1b** in 84% isolated yield.

### Characterization Data of 1b

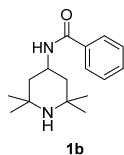

White powder; analytical TLC (silica gel 60) (40% methanol/ethyl acetate),  $R_f = 0.45$ ; <sup>1</sup>H NMR (400 MHz, CDCl<sub>3</sub>)  $\delta$  7.76 (d,  $J = 7.2$  Hz, 2H), 7.48 (t,  $J = 7.3$  Hz, 1H), 7.41 (t,  $J = 7.6$  Hz, 2H), 6.05 (d,  $J = 7.2$  Hz, 1H), 4.41-4.51 (m, 1H), 1.99 (dd,  $J = 6.2$  Hz, 2H), 1.29 (s, 6H), 1.14 (s, 6H), 1.04 (t,  $J = 12.2$  Hz, 2H); <sup>13</sup>C NMR (100 MHz, CDCl<sub>3</sub>)  $\delta$  166.70, 134.75, 131.34, 128.51, 126.75, 51.24, 45.20, 43.05, 34.82, 28.42; ESI-MS  $m/z$  261 [M+H]<sup>+</sup>; HRMS (ESI) for C<sub>16</sub>H<sub>25</sub>N<sub>2</sub>O, calcd. 261.1961, found 261.1960.

### Procedure for Synthesis of 2b

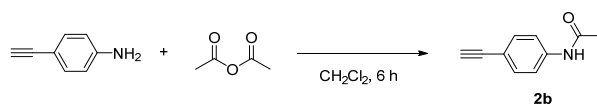

A mixture of 4-ethynylaniline (2.5 mmol) and acetic anhydride (3.3 mmol) in dichloromethane (5 mL) was stirred at room temperature for 6 h. After evaporation of solvent, the residue was purified by flash column chromatography using ethyl acetate/n-hexane as eluent to afford alkyne **2b** in 95% yield.

### Procedure for Synthesis of **4b**

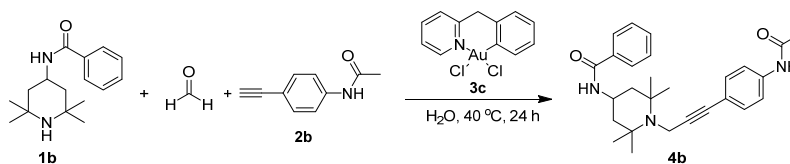

A mixture of formaldehyde (1 mmol), amine **1b** (1.1 mmol), alkyne **2b** (1.5 mmol) and cyclometallated gold(III) complex **3c** (0.01 mmol) in water (1 mL) was stirred at 40 °C for 24 h. After reaction, the mixture was extracted with ethyl acetate (15 mL  $\times$  3). The combined organic layer was dried over anhydrous MgSO<sub>4</sub>, filtered, and concentrated under reduced pressure. The residue was purified by flash column chromatography using ethyl acetate/n-hexane as eluent to give propargylamine **4b** in 36% yield.

### Characterization Data of **4b**

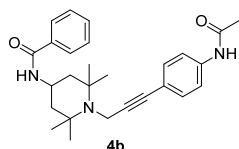

White powder; analytical TLC (silica gel 60) (70% ethyl acetate/n-hexane),  $R_f$  = 0.57; <sup>1</sup>H NMR (400 MHz, CD<sub>3</sub>OD)  $\delta$  7.81 (d,  $J$  = 7.2 Hz, 2H), 7.50 (d,  $J$  = 8.1 Hz, 3H), 7.44 (t,  $J$  = 7.0 Hz, 2H), 7.29 (d,  $J$  = 8.1 Hz, 2H), 4.36-4.42 (m, 1H), 3.63 (s, 2H), 2.11 (s, 3H), 1.79 (d,  $J$  = 10.0 Hz, 2H), 1.56 (t,  $J$  = 12.2 Hz, 2H), 1.32 (s, 6H), 1.25 (s, 6H); <sup>13</sup>C NMR (100 MHz, CDCl<sub>3</sub>)  $\delta$  171.65, 169.76, 139.59, 136.07, 132.82, 132.57, 129.52, 128.36, 120.86, 120.80, 92.69, 82.19, 57.37, 43.35, 34.22, 33.99, 23.89, 22.39; ESI-MS  $m/z$  432 [M+H]<sup>+</sup>; HRMS (ESI) for C<sub>27</sub>H<sub>34</sub>N<sub>3</sub>O<sub>2</sub>, calcd. 432.2646, found 432.2649.

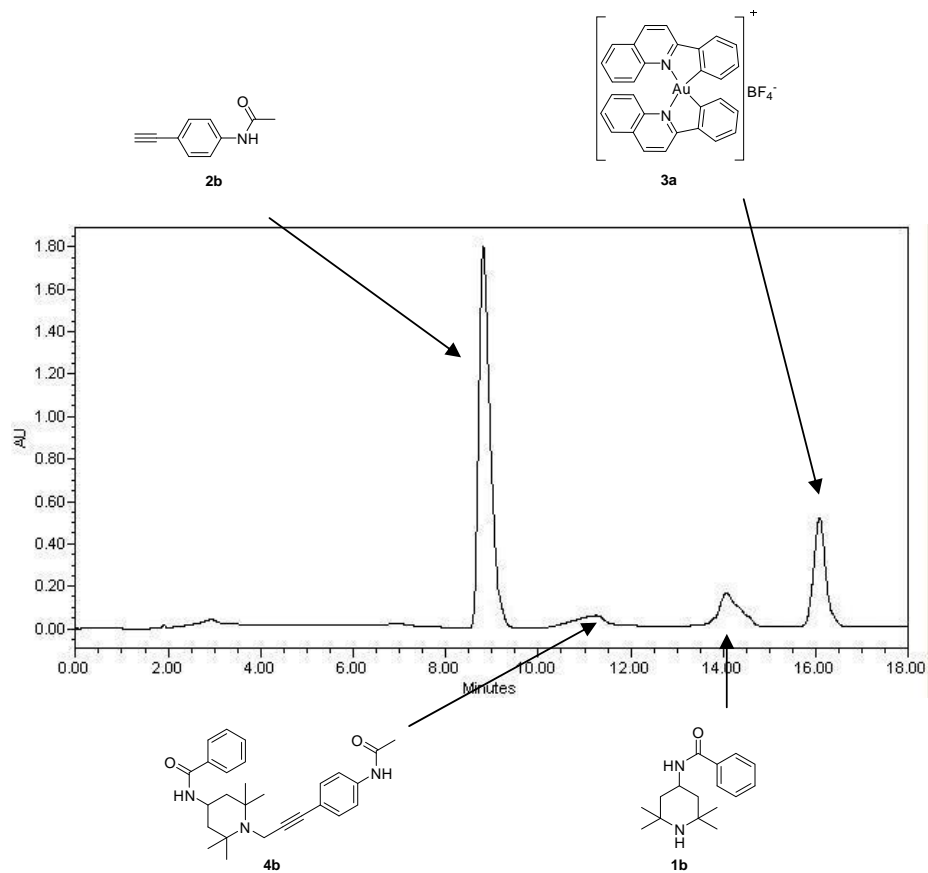

**Figure S1.** HPLC chromatogram for study of the model reaction.

**Table S1.** Data for construction of calibration curve for the model reaction

| Concentration of 4b | Peak Area (Determined by HPLC) |
|---------------------|--------------------------------|
| 1                   | 39195                          |
| 10                  | 324417                         |
| 50                  | 1797622                        |
| 100                 | 3481545                        |
| 200                 | 7222159                        |



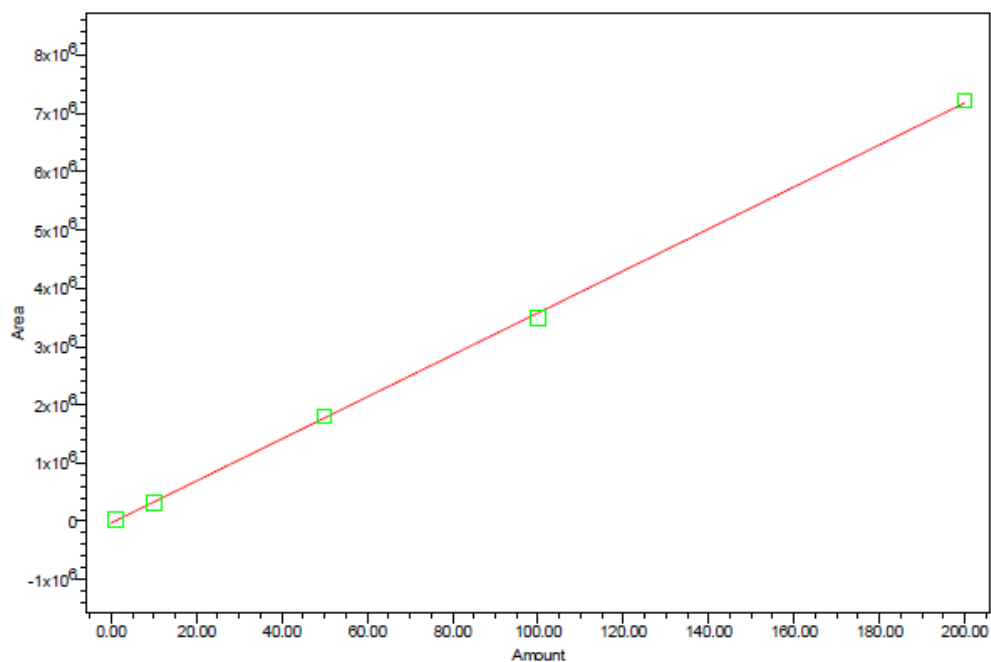

**Figure S2.** Calibration curve for quantification of propargylamine **4b** formed in the model reaction by HPLC. The x-axis is formaldehyde concentration and y-axis is peak area.

## Procedure for the Model Reaction for Optimization of Reaction Conditions

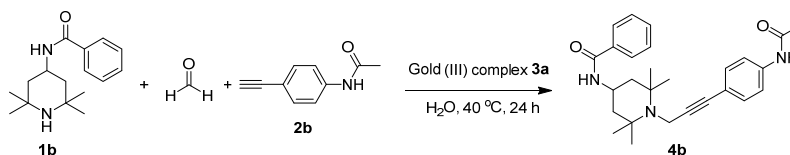

### Effect of Cyclometallated Gold(III) Complexes

A mixture of formaldehyde ( $20\text{ }\mu\text{mol}$ , in form of a  $100\text{ }\mu\text{L}$  aqueous solution), amine **1b** ( $22\text{ }\mu\text{mol}$ ), alkyne **2b** ( $30\text{ }\mu\text{mol}$ ) and cyclometallated gold(III) complex **3a** ( $4\text{ }\mu\text{mol}$ ) in water ( $600\text{ }\mu\text{L}$ ) was stirred at  $50\text{ }^\circ\text{C}$  for 1 h. After reaction,  $20\text{ }\mu\text{L}$  of the reaction mixture was mixed with  $980\text{ }\mu\text{L}$  acetonitrile for HPLC analysis. The reactions were repeated with cyclometallated gold(III) complexes **3b** and **3c**, respectively.

### Effect of Solvents

A mixture of formaldehyde ( $20\text{ }\mu\text{mol}$ , in form of an  $100\text{ }\mu\text{L}$  aqueous solution), amine **1b** ( $22\text{ }\mu\text{mol}$ ), alkyne **2b** ( $30\text{ }\mu\text{mol}$ ) and bis-cyclometallated gold(III) complex **3a** ( $4\text{ }\mu\text{mol}$ ) in water ( $600\text{ }\mu\text{L}$ ) was stirred at  $50\text{ }^\circ\text{C}$  for 1 h. After reaction,  $20\text{ }\mu\text{L}$  of the reaction mixture was mixed with  $980\text{ }\mu\text{L}$  acetonitrile for HPLC analysis. The reactions were repeated with acetonitrile, dimethylformamide, tetrahydrofuran, 1,4-dioxane, toluene, ethyl acetate and 1,2-dichloroethane as the solvent, respectively.

### Effect of Solvent Ratio

Mixtures of formaldehyde ( $20\text{ }\mu\text{mol}$ , in form of a  $50\text{ }\mu\text{L}$  aqueous solution), amine **1b** ( $22\text{ }\mu\text{mol}$ ), alkyne **2b** ( $30\text{ }\mu\text{mol}$ ) and bis-cyclometallated gold(III) complex **3a** ( $4\text{ }\mu\text{mol}$ ) in different volumes of 1,2-dichloroethane and water were stirred at  $50\text{ }^\circ\text{C}$  for 1 h. After reaction, 1,2-dichloroethane was added to the reaction mixtures to make up the organic layer to a final volume of  $450\text{ }\mu\text{L}$ , respectively. Then, the reaction mixtures were mixed by a vortex mixer for 1 min.  $20\text{ }\mu\text{L}$  of the organic layer was mixed with  $980\text{ }\mu\text{L}$  acetonitrile for HPLC analysis.

### Effect of Temperature

A mixture of formaldehyde ( $20\text{ }\mu\text{mol}$ , in form of a  $50\text{ }\mu\text{L}$  aqueous solution), amine **1b** ( $22\text{ }\mu\text{mol}$ ), alkyne **2b** ( $30\text{ }\mu\text{mol}$ ) and bis-cyclometallated gold(III) complex **3a** ( $4\text{ }\mu\text{mol}$ ) in 1,2-dichloroethane ( $450\text{ }\mu\text{L}$ ) was stirred at room temperature for 1 h. After reaction,  $20\text{ }\mu\text{L}$  of the organic layer was mixed with  $980\text{ }\mu\text{L}$  acetonitrile for HPLC analysis. The reaction was repeated at  $40\text{ }^\circ\text{C}$ ,  $50\text{ }^\circ\text{C}$  and  $60\text{ }^\circ\text{C}$ , respectively.

### Effect of Reagent Ratio

A mixture of formaldehyde (in form of a 50  $\mu\text{L}$  aqueous solution), amine **1b**, alkyne **2b** and bis-cyclometallated gold(III) complex **3a** in different amounts in 1,2-dichloroethane (450  $\mu\text{L}$ ) was stirred at 50  $^{\circ}\text{C}$  for 1 h. After reaction, 20  $\mu\text{L}$  of the organic layer was mixed with 980  $\mu\text{L}$  acetonitrile for HPLC analysis.

**Table S2.** Screening for the effect of different cyclometallated gold (III) complexes on the yield of propargylamine **4b** in the model reaction<sup>a</sup>

| Entry | Cyclometallated gold(III) complex                                                  | Yield of <b>4b</b> <sup>b</sup> (%) |
|-------|------------------------------------------------------------------------------------|-------------------------------------|
| 1     | 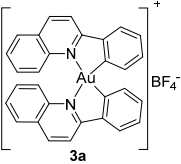  | 4.0                                 |
| 2     |   | 1.1                                 |
| 3     |  | 2.2                                 |

<sup>a</sup> Reactions were carried out with formaldehyde (20  $\mu\text{mol}$ , in form of an aqueous solution), amine **1b** (22  $\mu\text{mol}$ ), alkyne **2b** (30  $\mu\text{mol}$ ) and cyclometallated gold(III) complexes **3a-c** (4  $\mu\text{mol}$ ) in water at 50  $^{\circ}\text{C}$  for 1 h. <sup>b</sup> Determined by HPLC.

**Table S3.** Screening for the effect of solvents on the yield of product **4b** in the model reaction<sup>a</sup>

| Entry | Solvent <sup>b</sup> | Yield of <b>4b</b> <sup>c</sup> (%) |
|-------|----------------------|-------------------------------------|
| 1     | Water                | 3.8                                 |
| 2     | Acetonitrile         | -                                   |
| 3     | Dimethylformamide    | -                                   |
| 4     | Tetrahydrofuran      | 1.6                                 |
| 5     | 1,4-Dioxane          | 2.2                                 |
| 6     | Toluene              | 1.1                                 |
| 7     | Ethyl Acetate        | 5.4                                 |
| 8     | 1,2-Dichloroethane   | 12.1                                |

<sup>a</sup> Reactions were carried out with formaldehyde (20  $\mu\text{mol}$ , in form of an aqueous solution), amine **1b** (22  $\mu\text{mol}$ ), alkyne **2b** (30  $\mu\text{mol}$ ) and bis-cyclometallated gold(III) complex **3a** (4  $\mu\text{mol}$ ) at 50  $^{\circ}\text{C}$  for 1 h. <sup>b</sup> 600  $\mu\text{L}$  of solvent was used. <sup>c</sup> Determined by HPLC.

**Table S4.** Screening for the effect of ratio of 1,2-dichloroethane to water on the yield of product **4b** in the model reaction<sup>a</sup>

| Entry | 1,2-Dichloroethane ( $\mu\text{L}$ ) | Water ( $\mu\text{L}$ ) | Ratio | Yield of <b>4b</b> <sup>b</sup> (%) |
|-------|--------------------------------------|-------------------------|-------|-------------------------------------|
| 1     | 50                                   | 450                     | 1:9   | 2.2                                 |
| 2     | 100                                  | 400                     | 1:4   | 3.1                                 |
| 3     | 150                                  | 350                     | 3:7   | 3.7                                 |
| 4     | 200                                  | 300                     | 2:3   | 2.5                                 |
| 5     | 250                                  | 250                     | 1:1   | 3.7                                 |
| 6     | 300                                  | 200                     | 3:2   | 4.2                                 |
| 7     | 350                                  | 150                     | 7:3   | 4.5                                 |
| 8     | 400                                  | 100                     | 4:1   | 8.8                                 |
| 9     | 450                                  | 50                      | 9:1   | 11.4                                |

<sup>a</sup> Reactions were carried out with formaldehyde (20  $\mu\text{mol}$ , in form of an aqueous solution), amine **1b** (22  $\mu\text{mol}$ ), alkyne **2b** (30  $\mu\text{mol}$ ) and bis-cyclometallated gold(III) complex **3a** (4  $\mu\text{mol}$ ) at 50 °C for 1 h. <sup>b</sup> Determined by HPLC.

**Table S5.** Screening for the effect of temperatures on the yield of product **4b** in the model reaction<sup>a</sup>

| Entry | Temperature ( $^{\circ}\text{C}$ ) | Yield of <b>4b</b> <sup>b</sup> (%) |
|-------|------------------------------------|-------------------------------------|
| 1     | 25                                 | -                                   |
| 2     | 40                                 | 3.6                                 |
| 3     | 50                                 | 12.1                                |
| 4     | 60                                 | 4.1                                 |

<sup>a</sup> Reactions were carried out with formaldehyde (20  $\mu\text{mol}$ , in form of an aqueous solution), amine **1b** (22  $\mu\text{mol}$ ), alkyne **2b** (30  $\mu\text{mol}$ ) and gold(III) complex **3a** (4  $\mu\text{mol}$ ) in 1,2-dichloroethane (450  $\mu\text{L}$ ) for 1 h. <sup>b</sup> Determined by HPLC.

**Table S6.** Screening for the effect of reagents ratios on the yield of product **4b** in the model reaction<sup>a</sup>

| Entry | Amine <b>1b</b><br>( $\mu\text{mol}$ ) | Alkyne <b>2b</b><br>( $\mu\text{mol}$ ) | Gold(III) complex <b>3a</b><br>( $\mu\text{mol}$ ) | Yield of <b>4b</b> <sup>b</sup><br>(%) |
|-------|----------------------------------------|-----------------------------------------|----------------------------------------------------|----------------------------------------|
| 1     | 10                                     | 15                                      | 2                                                  | -                                      |
| 2     | 10                                     | 50                                      | 10                                                 | 18                                     |
| 3     | 10                                     | 50                                      | 30                                                 | 19                                     |
| 4     | 10                                     | 100                                     | 1                                                  | 5                                      |
| 5     | 10                                     | 100                                     | 2                                                  | -                                      |
| 6     | 10                                     | 150                                     | 2                                                  | -                                      |
| 7     | 10                                     | 200                                     | 1                                                  | 1                                      |
| 8     | 50                                     | 10                                      | 10                                                 | 19                                     |
| 9     | 50                                     | 50                                      | 30                                                 | 41                                     |

|                 |     |     |    |    |
|-----------------|-----|-----|----|----|
| 10              | 50  | 50  | 50 | 8  |
| 11              | 50  | 100 | 2  | -  |
| 12              | 50  | 100 | 50 | 56 |
| 13              | 50  | 150 | 2  | -  |
| 14              | 100 | 50  | 50 | 40 |
| 15              | 100 | 150 | 2  | 6  |
| 16              | 100 | 100 | 50 | 53 |
| 17 <sup>c</sup> | 10  | 15  | 1  | 3  |
| 18 <sup>c</sup> | 10  | 100 | 1  | 9  |
| 19 <sup>c</sup> | 10  | 100 | 2  | 16 |
| 20 <sup>d</sup> | 20  | 30  | 2  | 4  |
| 21 <sup>d</sup> | 20  | 200 | 2  | 23 |
| 22 <sup>d</sup> | 20  | 200 | 4  | 46 |
| 23 <sup>e</sup> | 10  | 15  | 1  | 5  |
| 24 <sup>e</sup> | 10  | 100 | 2  | 28 |
| 25 <sup>f</sup> | 20  | 30  | 2  | 12 |

<sup>a</sup> Unless otherwise specified, reactions were carried out with formaldehyde (10  $\mu\text{mol}$ , in form of an aqueous solution) in 1,2-dichloroethane (450  $\mu\text{L}$ ) at 50  $^{\circ}\text{C}$  for 1 h. <sup>b</sup> Determined by HPLC. <sup>c</sup> 100  $\mu\text{mol}$  of formaldehyde was used. <sup>d</sup> 200  $\mu\text{mol}$  of formaldehyde was used. <sup>e</sup> 300  $\mu\text{mol}$  of formaldehyde was used. <sup>f</sup> 600  $\mu\text{mol}$  of formaldehyde was used.

### Procedure for Synthesis of **2c**

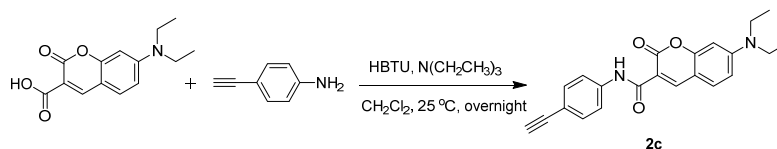

A mixture of 7-(diethylamino)coumarin-3-carboxylic acid (0.5 mmol), 4-ethynylaniline (0.6 mmol), triethylamine (1 mmol) and HBTU (0.6 mmol) in dichloromethane (20 mL) was stirred under nitrogen atmosphere at room temperature for overnight. After reaction, the mixture was washed with water (15 mL  $\times$  3). The organic layer was dried over anhydrous  $\text{MgSO}_4$ , filtered, and concentrated under reduced pressure. The residue was purified by flash column chromatography using dichloromethane/n-hexane as eluent to give **2c** in 79% yield.

### Procedure for Synthesis of Resin-linked Sterically Bulky Amine **1e**

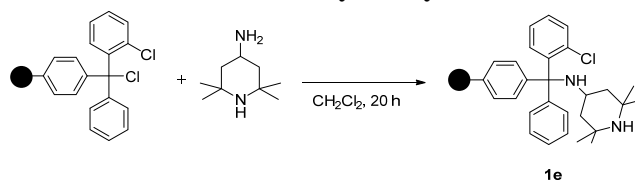

Commercially available polymer-bound 2-chlorotrityl chloride resin (15 mg) was swollen in dichloromethane (250  $\mu$ L) for 15 min. 4-Amino-2,2,6,6-tetramethylpiperidine (0.19 mmol) was added and the reaction vessel was gently shaken for 20 h. After reaction, 12  $\mu$ L HPLC grade methanol was added and mixed for 15 min to endcap any remaining reactive 2-chlorotrityl groups. The resin was washed three times with 1 mL of dichloromethane, two times with 1 mL of dimethylformamide, and three times with 1 mL of dichloromethane and then dried for future use. Reference: J. J. McNally, M. A. Youngman and S. L. Dax, *Tetrahedron Lett.*, 1998, **39**, 967-970.

### Procedure for A3-Coupling of Formaldehyde with Resin-linked Sterically Bulky Amine **1e** and Coumarin-linked Alkyne **2c**

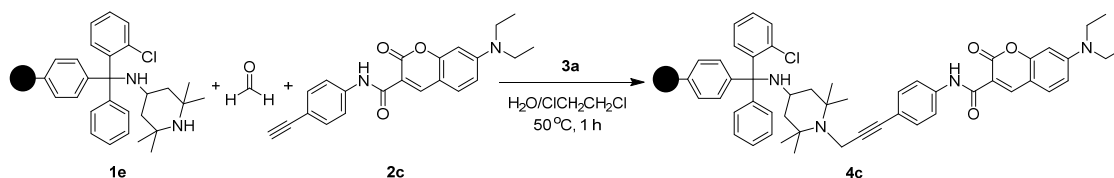

A mixture of solid-supported amine **1e** (15 mg), formaldehyde (0.02 mmol, in form of an 100  $\mu$ L aqueous solution), coumarin-linked alkyne **2c** (0.02 mmol), bis-cyclometallated gold(III) complex **3a** (0.01 mmol), and 600  $\mu$ L of 1,2-dichloroethane was gently stirred at 50  $^{\circ}$ C for 1 h. After reaction, the resin was washed four times with 1 mL of dichloromethane, two times with 1 mL of dimethylformamide, and three times with 1 mL of dichloromethane.

### Procedure for Cleavage from Resin Support **4c** to Give Propargylamine **5a**

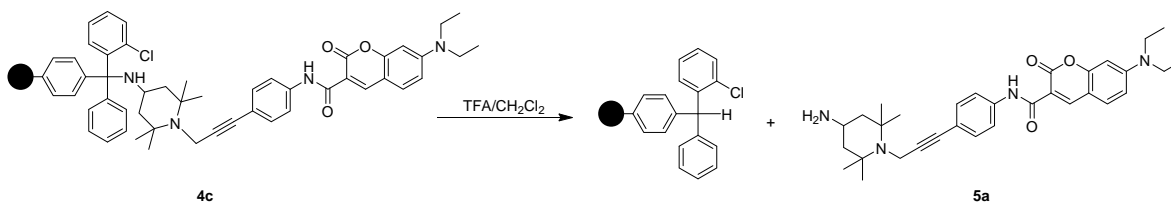

Resins **4c** (15 mg) were suspended in 1:1 trifluoroacetic acid and dichloromethane (300  $\mu$ L) at room temperature for 1 min for cleavage of propargylamine **5a** from the solid support. The solution was analyzed by ESI-MS, and propargylamine **5a** ( $m/z = 529.27$   $[M+H]^+$ ) was detected. The solution was then neutralized by saturated  $\text{NaHCO}_3$  solution (5 mL). The organic layer was dried over anhydrous  $\text{MgSO}_4$ , filtered, and concentrated under reduced pressure. The residue was purified by flash column chromatography using methanol/dichloromethane as eluent to give propargylamine **5a** in 4% yield.

### Characterization Data of 5a

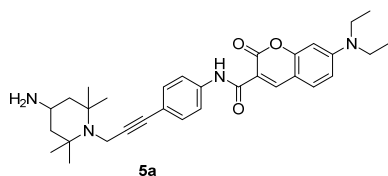

Yellow powder; analytical TLC (silica gel 60) (10% methanol/dichloromethane),  $R_f = 0.42$ ;  $^1\text{H}$  NMR (400 MHz,  $d_6$ -DMSO)  $\delta$  8.75 (s, 1H), 7.73 (d,  $J = 9.1$  Hz, 1H), 7.68 (d,  $J = 8.6$  Hz, 2H), 7.33 (d,  $J = 8.6$  Hz, 2H), 6.85 (dd,  $J = 4.5$  Hz, 1H), 6.66 (d,  $J = 2.1$  Hz, 1H), 3.56 (s, 2H), 3.48-3.53 (m, 4H), 1.78 (dd,  $J = 6.1$  Hz, 4H), 1.41 (t,  $J = 6.7$  Hz, 3H), 1.23 (s, 6H), 1.15 (t,  $J = 6.7$  Hz, 3H), 1.08 (s, 6H);  $^{13}\text{C}$  NMR (125 MHz,  $\text{CD}_3\text{OD}$ )  $\delta$  163.34, 162.24, 158.15, 153.74, 148.96, 131.79, 131.68, 119.95, 119.83, 114.50, 110.75, 108.98, 108.77, 96.15, 91.35, 81.14, 55.62, 47.37, 45.02, 32.65, 27.53, 21.08, 11.51; ESI-MS  $m/z$  529  $[\text{M}+\text{H}]^+$ ; HRMS (ESI+) for  $\text{C}_{32}\text{H}_{41}\text{N}_4\text{O}_3$ , calcd. 529.3173, found 529.3177.

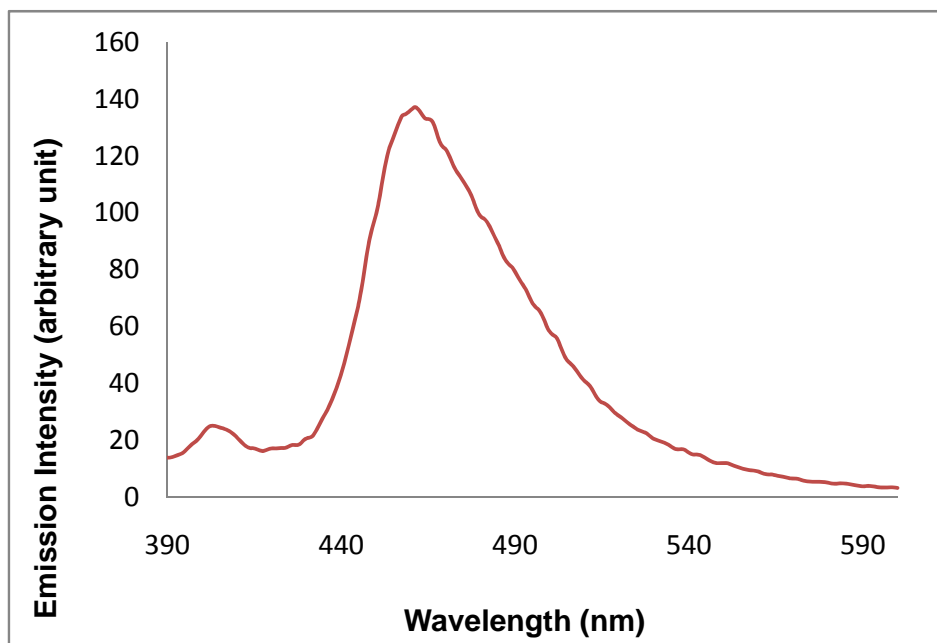

**Figure S3.** Fluorescent spectrum of propargylamine **5a**.

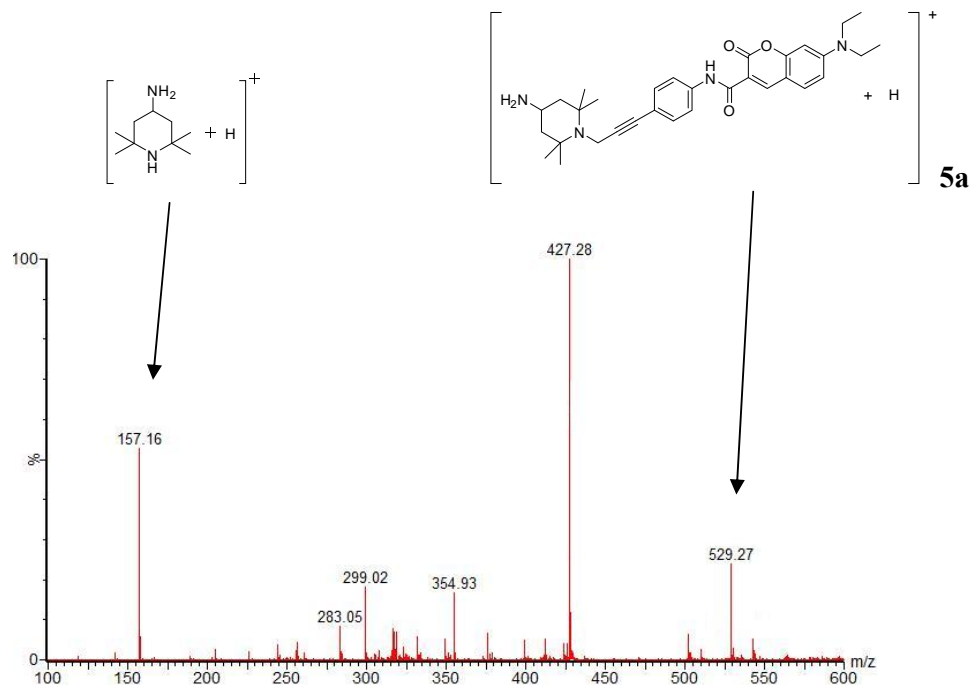

**Figure S4.** MS spectrum of propargylamine **5a** cleaved from the resin beads.

#### Determination of Propargylamine **5a** by LC-MS/MS

Resins **4c** (15 mg) from different reaction mixtures (concentration of formaldehyde from 4 to 103 ppm) were suspended in 1:1 trifluoroacetic acid and dichloroethane (300  $\mu$ L) at room temperature for 10 min for cleavage of propargylamine **5a** from the solid support. The solution was then neutralized by saturated  $\text{NaHCO}_3$  solution (300  $\mu$ L). The upper aqueous layer was removed by dropper, and the organic layer and the resins were dried in oven at 75  $^\circ\text{C}$ . Then, 1.3 mL of acetonitrile was added into the dried mixtures, and the solution was prepared for LC-MS/MS analysis.

For LC-MS/MS analysis, the m/z of precursor ions were 529.4 ( $[\text{M}+\text{H}]^+$ ) for propargylamine **5a** while the fragment ions (daughter ions) were 373.2.

**Table S7.** Data for construction of calibration curve for the cleavage propargylamine **5a**.

| Formaldehyde concentration | Peak area (arbitrary unit) |
|----------------------------|----------------------------|
| 4                          | 1.71E+05                   |
| 10                         | 2.83E+05                   |
| 51                         | 8.96E+05                   |
| 103                        | 1.96E+06                   |



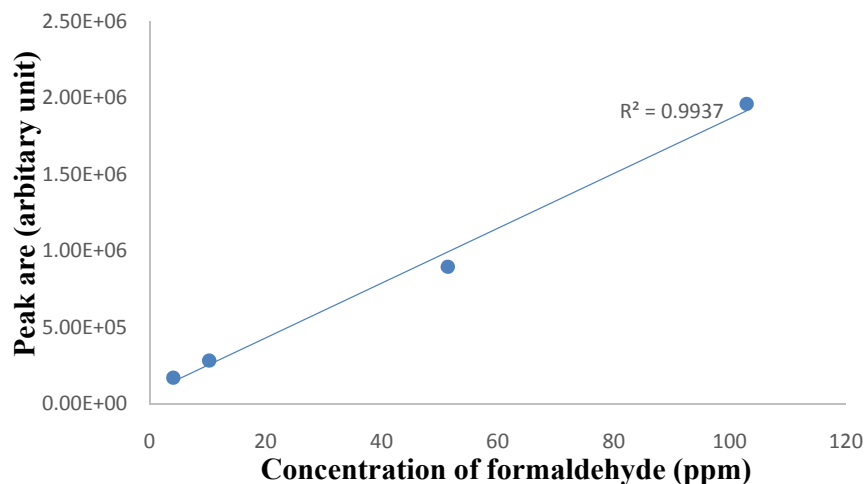

**Figure S5.** Calibration curve for the cleavage propargylamine **5a**.

#### **Measurement of Fluorescent Intensity by Microplate Reader**

Resins **4c** (2.0 mg) from different reaction mixtures (concentration of formaldehyde from 0 to 500 ppm) were accurately weighed and transferred to a microplate for measurement of fluorescent intensity. The fluorescent intensity was measured by a BMG FLUOstar Galaxy Fluorescence Microplate Reader. The number of cycles, number of flash, and cycle time were set as 10. The delay time was set as 0.5 second. The excitation wavelength was 355 nm and emission wavelength was 460 nm.

**Table S8.** Data for construction of calibration curve for the resin beads

| <b>Formaldehyde concentration</b> | <b>Fluorescent intensity (arbitrary unit)</b> |
|-----------------------------------|-----------------------------------------------|
| 0                                 | 1031                                          |
| 50                                | 2187                                          |
| 100                               | 2939                                          |
| 500                               | 7603                                          |

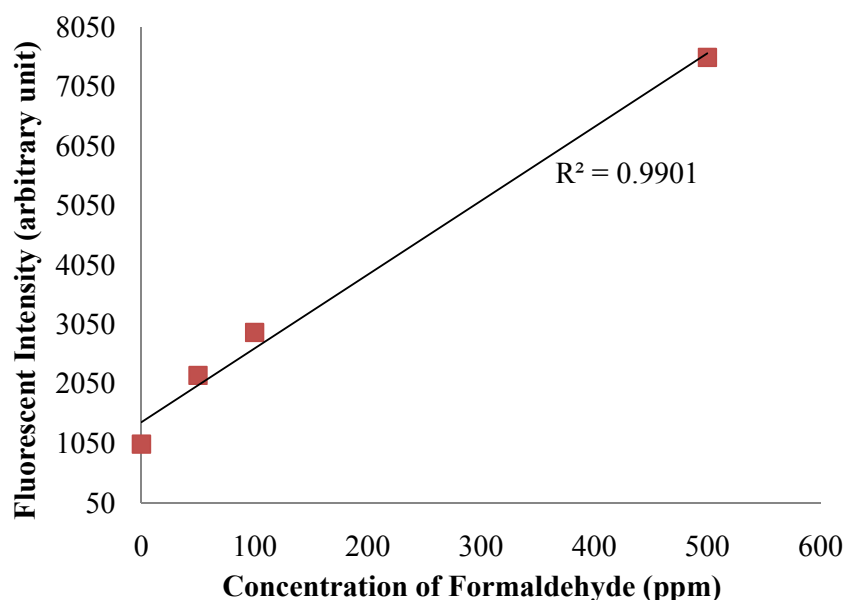

**Figure S6.** Calibration curve for the resin beads.

#### **Procedure for Using Water Extract of Mushroom as Formaldehyde Source**

The purchased dried mushroom sample was sealed in plastic bags at room temperature without direct exposure to light. The mushroom sample with stems removed was homogenized by a blender. About 2 g of the sample was weighed and stored in a centrifuge tube. Milli-Q<sup>®</sup> water (20 mL) was added into the tube and the tube was sealed. The tube was placed into an ultrasonic bath for extraction at 40 °C for 1 hour. After that, the sample was centrifuged at 4000 rpm for 10 mins. The centrifuged sample was filtered with filter paper and funnel. The filtrate was collected by a 50 mL volumetric flask. Milli-Q<sup>®</sup> water (20 mL) was added into the centrifuge tube again and the tube was placed into an ultrasonic bath for extraction at 40 °C for 30 mins. The sample was centrifuged at 4000 rpm for 10 mins. The centrifuged sample was filtered with filter paper and funnel. The filtrate was collected by the 50 mL volumetric flask used previously. The flask was made up with Milli-Q<sup>®</sup> water and was mixed well. This gave the water extract of the mushroom sample.

ESI-MS analysis was used to confirm the cleaved product **5a** when mushroom water extract was used as formaldehyde source. A mixture of solid-supported amine **1e** (15 mg), water extract of mushroom (100 µL), coumarin alkyne **2c** (0.02 mmol), bis-cyclometallated gold(III) complex **3a** (0.01 mmol) and 600 µL of 1,2-dichloroethane was gently stirred at 50 °C for 1 h. After reaction, the resins were washed four times with 1 mL of dichloromethane, two times with 1 mL of dimethylformamide, and three times with 1 mL of dichloromethane. The product was cleaved (by using 1:1 trifluoroacetic acid and dichloromethane (300 µL) at room temperature for 1 min) from the resin support and analyzed by ESI-MS for confirmation of product formation.

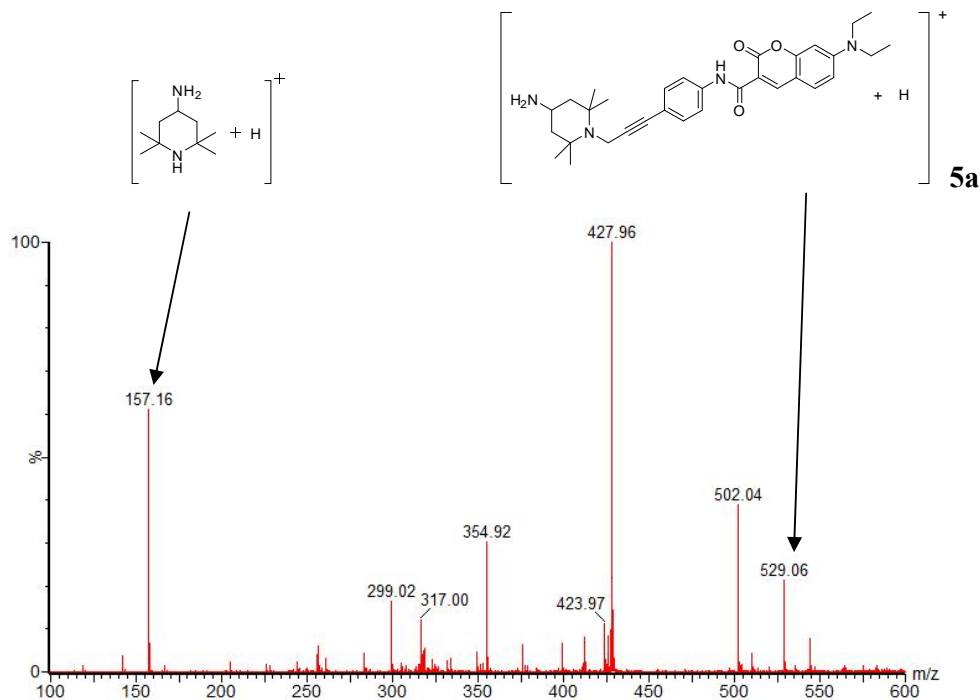

**Figure S7.** MS spectrum of cleaved product from the resin beads using mushroom sample as the formaldehyde source.

LC-MS/MS analysis was used to quantify the amount of formaldehyde in mushroom water extracts. Another calibration curve was built up for quantitative analysis based on the mentioned procedure and a good linear relationship ( $R^2 = 0.9799$ ) between the formaldehyde concentration and peak area was obtained.

**Table S9.** Data for construction of calibration curve for the cleavage propargylamine **5a**.

| Formaldehyde concentration | Peak area (arbitrary unit) |
|----------------------------|----------------------------|
| 10                         | 107000                     |
| 10                         | 98900                      |
| 51                         | 301000                     |
| 51                         | 332000                     |
| 103                        | 429000                     |
| 103                        | 399000                     |

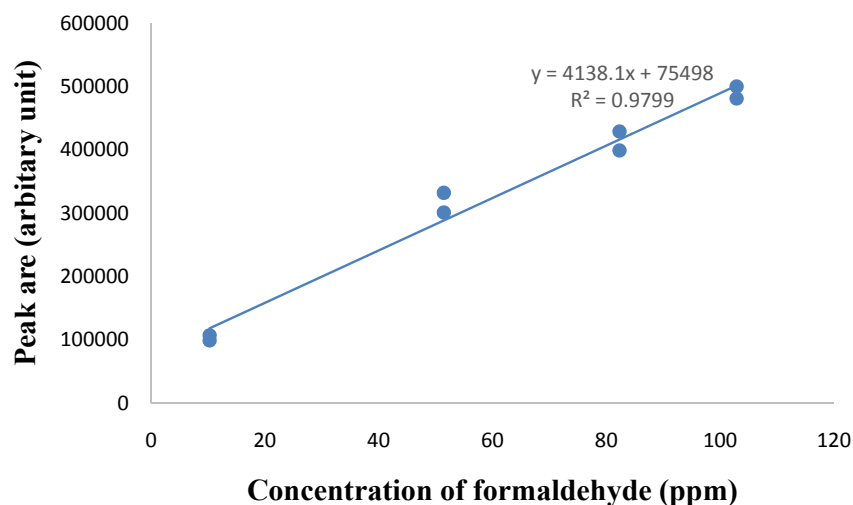

**Figure S8.** Calibration curve for the cleavage of propargylamine **5a**.

Resins **4c** (15 mg) from reaction mixtures (mushroom water extracts were used as formaldehyde source) were suspended in 1:1 trifluoroacetic acid and dichloroethane (300  $\mu$ L) at room temperature for 10 min for cleavage of propargylamine **5a** from the solid support. The solution was then neutralized by saturated  $\text{NaHCO}_3$  solution (300  $\mu$ L). The upper aqueous layer was removed by dropper, and the remaining organic layer and resins were dried in oven at 75  $^\circ\text{C}$ . Then, 1.3 mL of acetonitrile was added into the dried mixtures, and the solution was prepared for LC-MS/MS analysis. For LC-MS/MS analysis, the  $m/z$  of precursor ions were 529.4 ( $[\text{M}+\text{H}]^+$ ) for propargylamine **5a** while the fragment ions (daughter ions) were 373.2.

The quantity of formaldehyde in water extract was calculated by correlating the peak area and the calibration curve built up (**Figure S8**).

**Table S10.** Data for quantitative determination of formaldehyde in mushroom water extract

| Sample            | Peak area (arbitrary unit) | Formaldehyde concentration (ppm) |
|-------------------|----------------------------|----------------------------------|
| Mushroom sample 1 | 234000                     | 36.0                             |
|                   | 239000                     | 37.2                             |
| Mushroom sample 2 | 218000                     | 31.8                             |
|                   | 219000                     | 32.0                             |

# NMR Spectrum of 1b

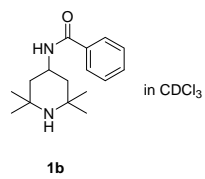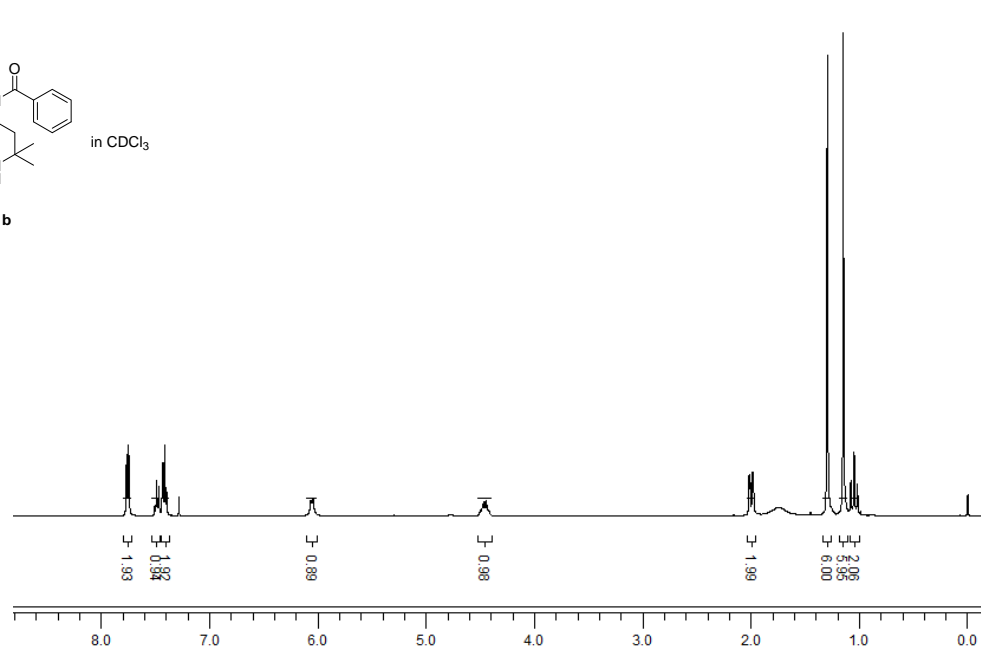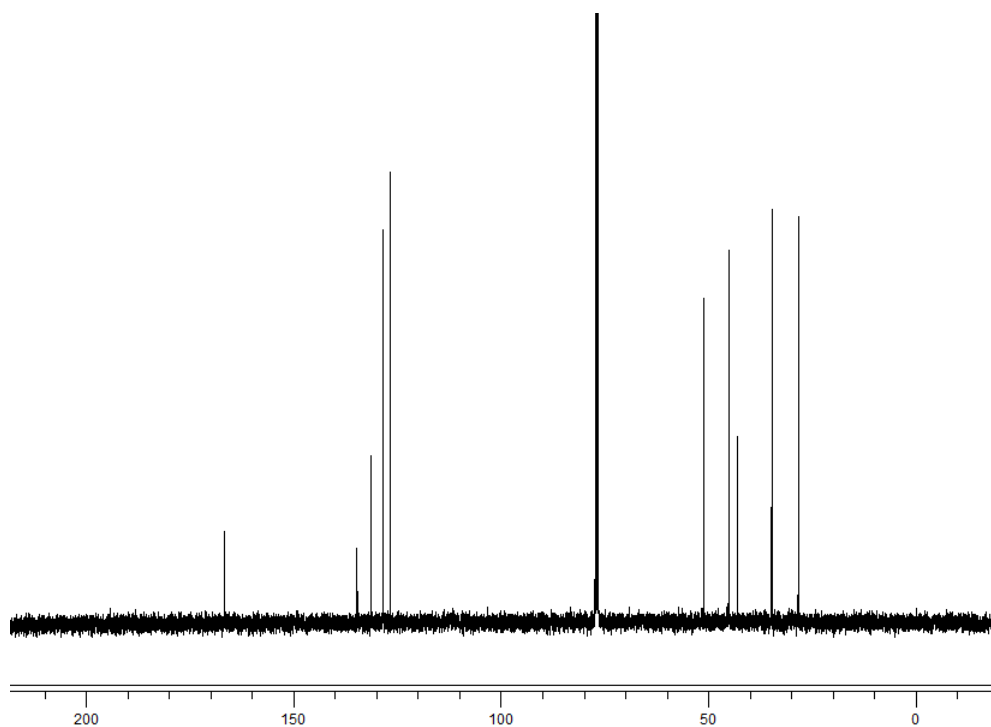

# NMR Spectrum of 4b

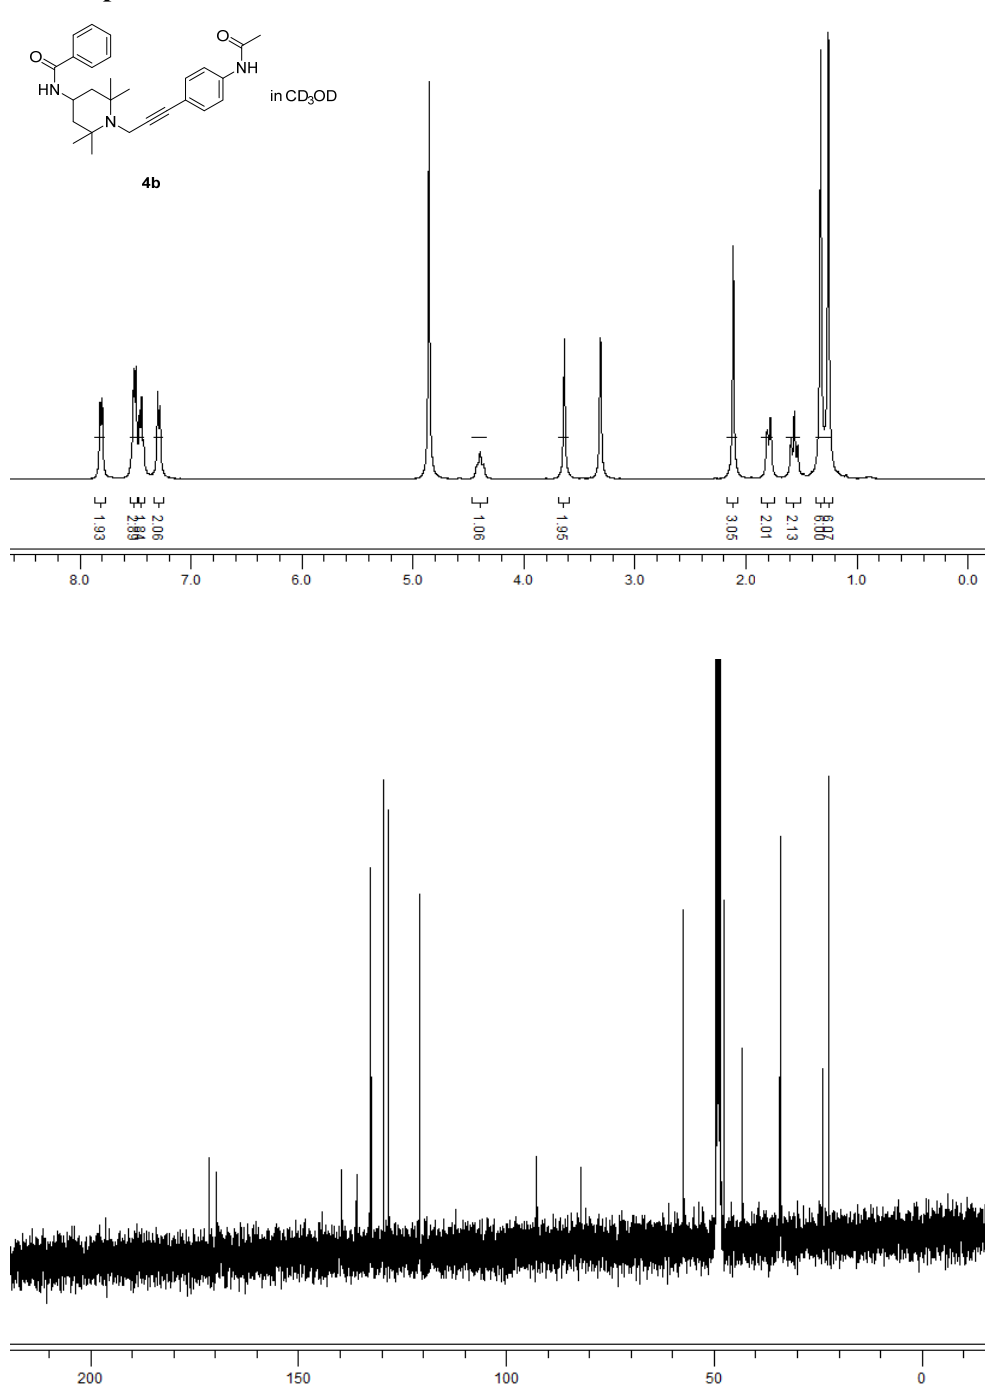

# NMR Spectrum of 5a

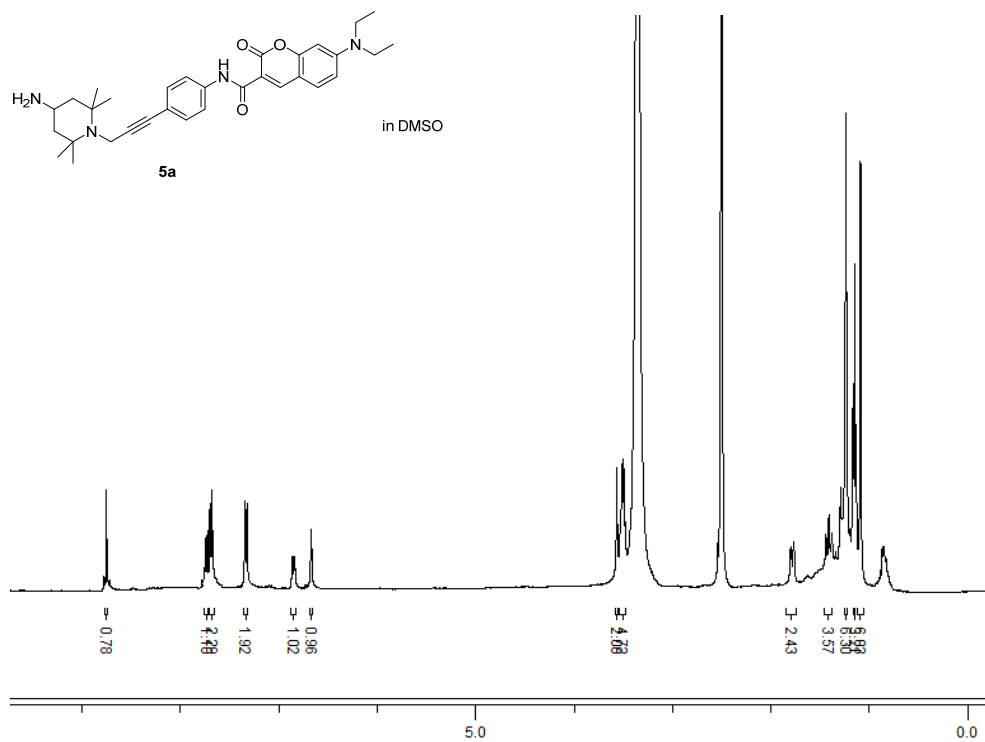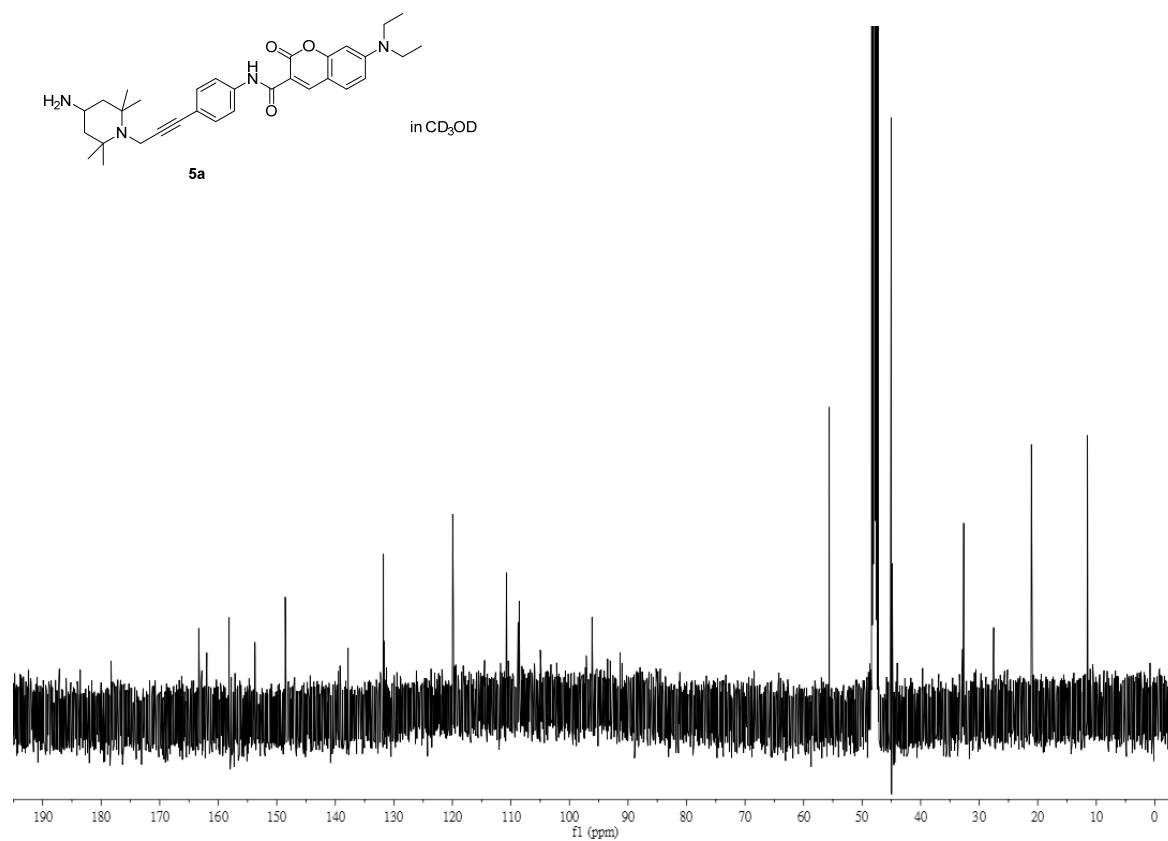

Supplement: c5ob00966a1.pdf [file c5ob00966a1.pdf]
